# Supplementary material
Source: PubMed Central journal article supplement (PMC3704215)

# Figure S1

## A

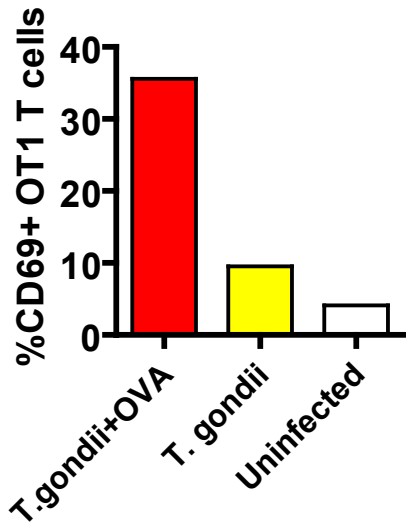

## B

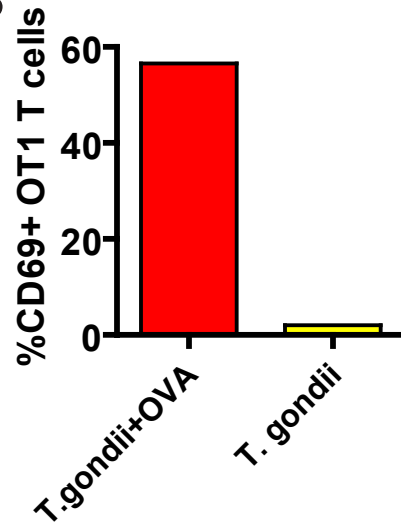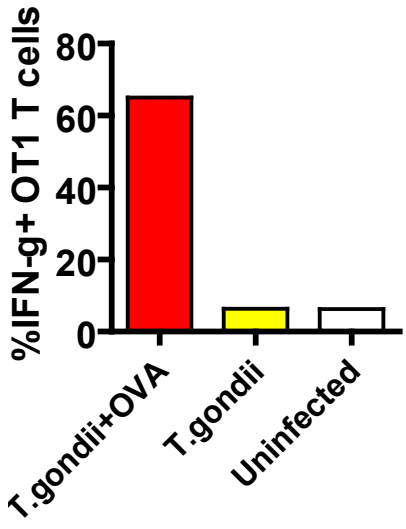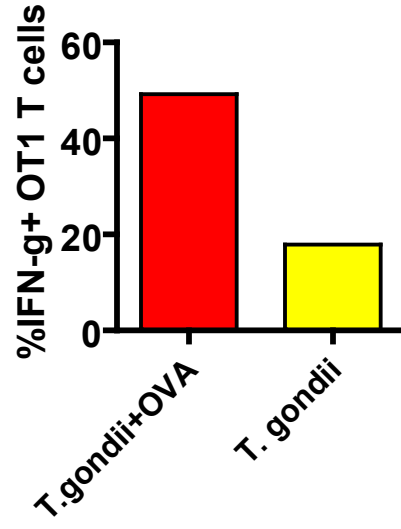

# Figure S2

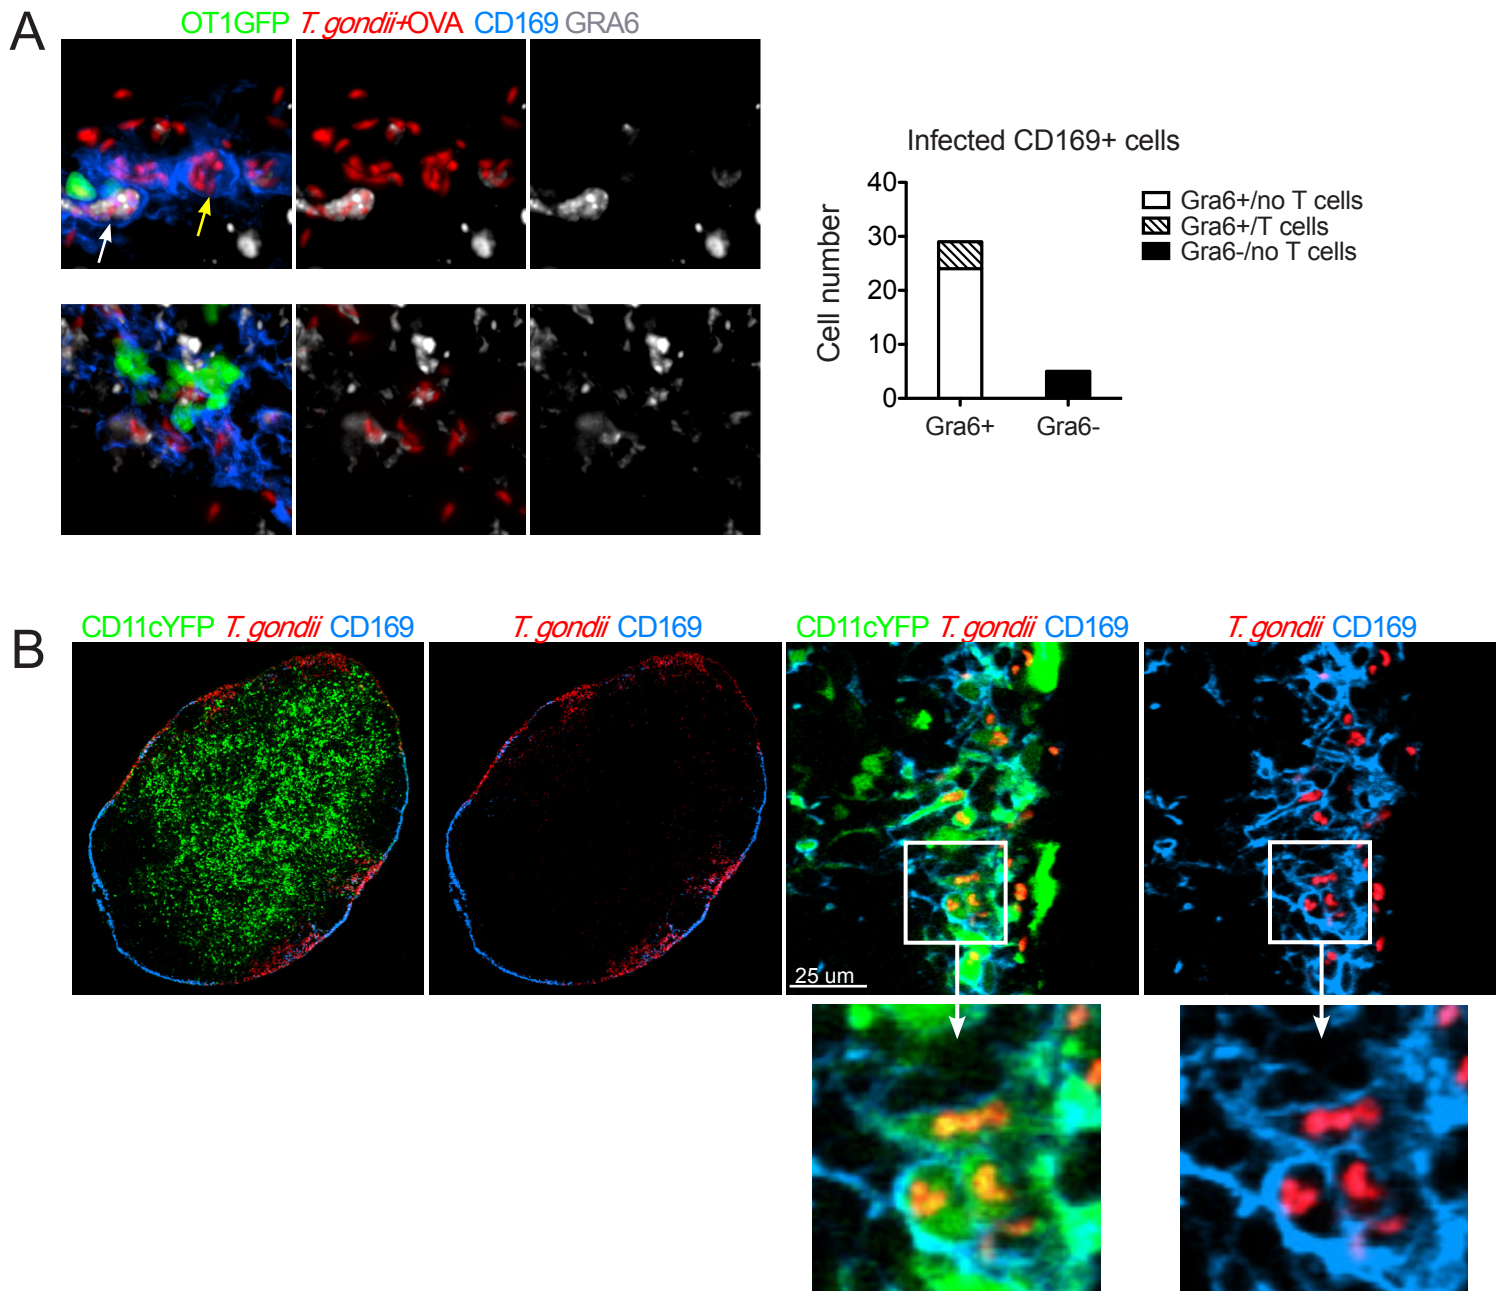

# Figure S3

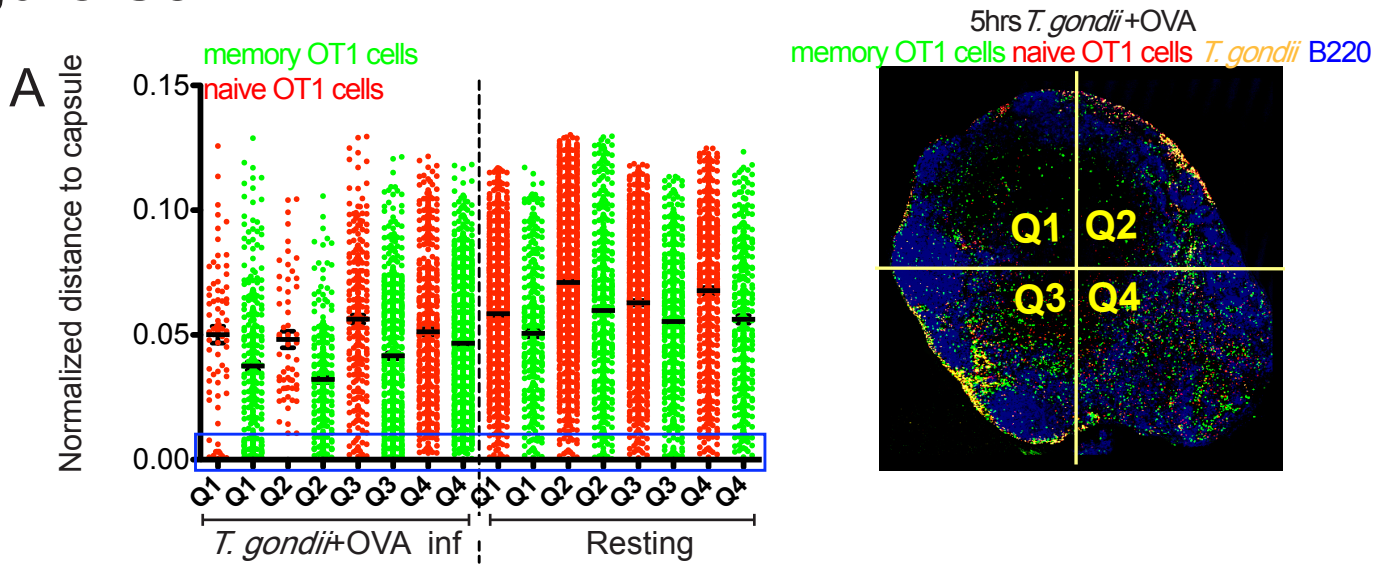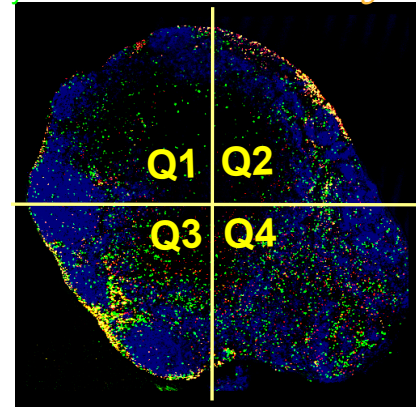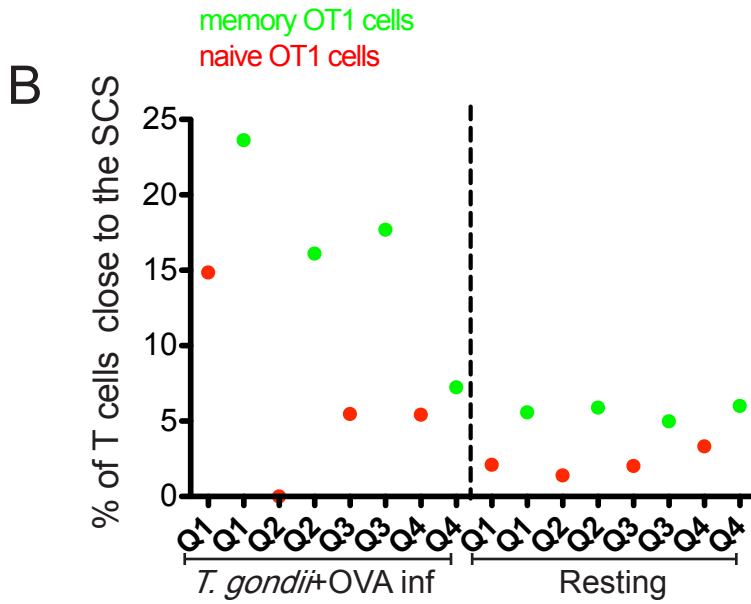

# Figure S4

**A** Naive OT1  
Memory OT1

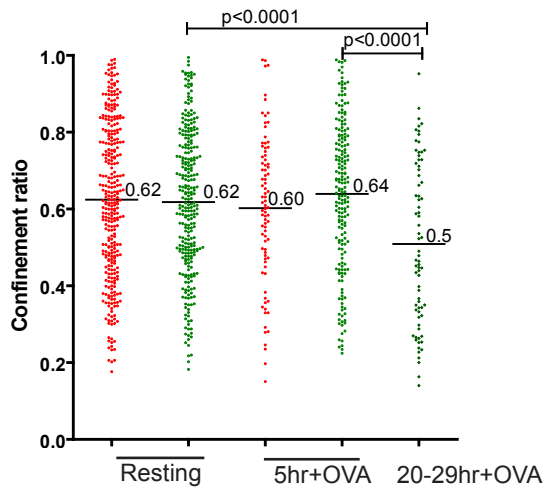

**B** Naive OT1  
Memory OT1

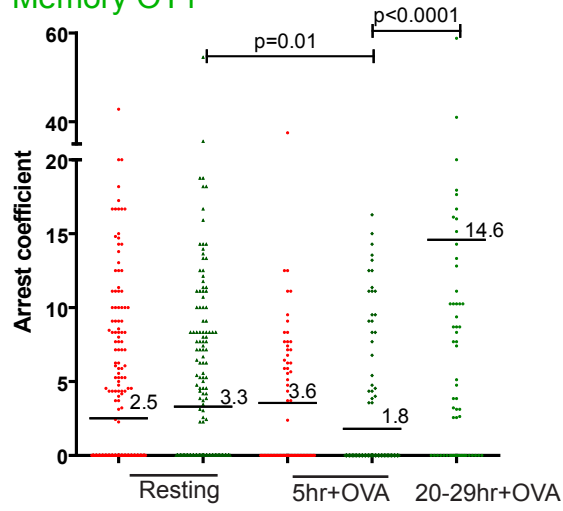

# Figure S5

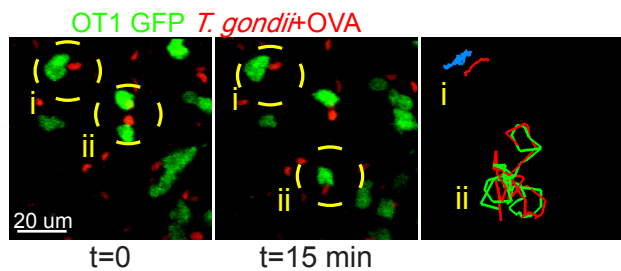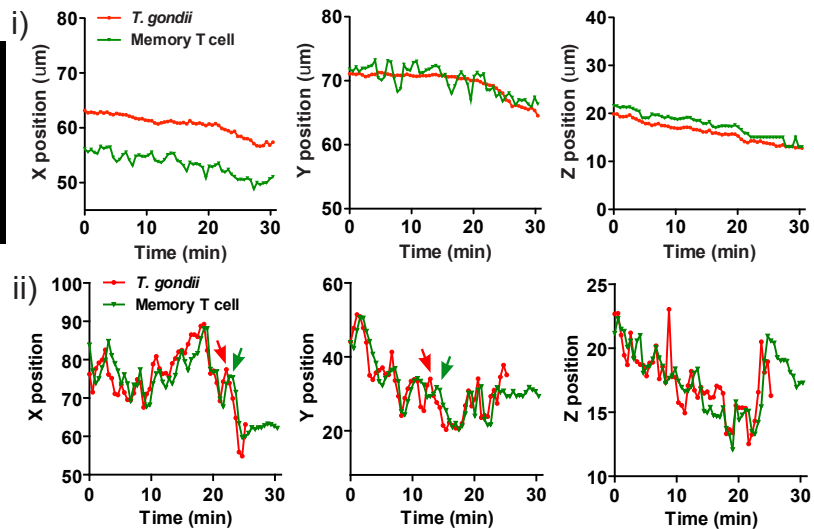

Figure S6

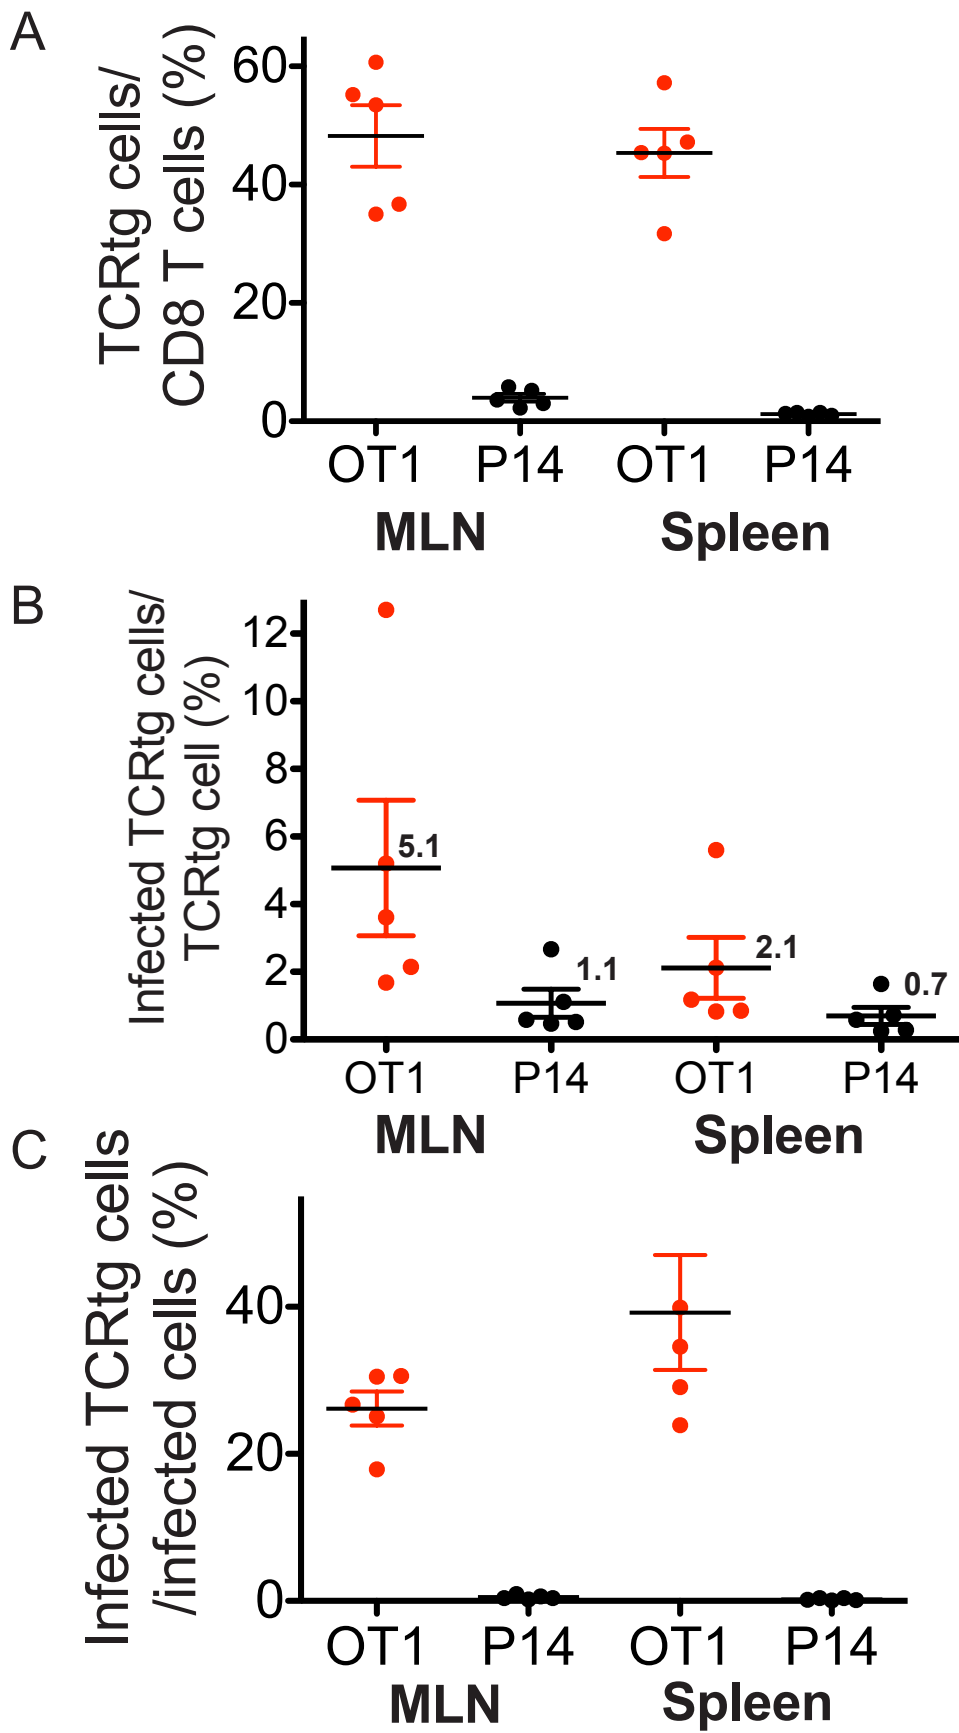

Supplement: NIHMS136384-supplement-01.pdf [file NIHMS136384-supplement-01.pdf]
